# Supplementary material for: Natural aging course of paraspinal muscle and back extensor strength in community-dwelling older adults (sarcopenia of spine, SarcoSpine): a prospective cohort study protocol
Source: PubMed Central journal article supplement — BMJ Open. 2019 Sep 5;9(9):e032443. doi: 10.1136/bmjopen-2019-032443 (PMC6731812; doi:10.1136/bmjopen-2019-032443), 2019-09-05
Supplement: bmjopen-2019-032443.draft_revisions.pdf [file bmjopen-2019-032443.draft_revisions.pdf]

# BMJ Open

BMJ Open is committed to open peer review. As part of this commitment we make the peer review history of every article we publish publicly available.

When an article is published we post the peer reviewers' comments and the authors' responses online. We also post the versions of the paper that were used during peer review. These are the versions that the peer review comments apply to.

The versions of the paper that follow are the versions that were submitted during the peer review process. They are not the versions of record or the final published versions. They should not be cited or distributed as the published version of this manuscript.

BMJ Open is an open access journal and the full, final, typeset and author-corrected version of record of the manuscript is available on our site with no access controls, subscription charges or pay-per-view fees (<http://bmjopen.bmj.com>).

If you have any questions on BMJ Open's open peer review process please email [info.bmjopen@bmj.com](mailto:info.bmjopen@bmj.com)

# BMJ Open

## Sarcopenia of Spine (SarcoSpine): A Prospective Cohort Study Protocol

|                               |                                                                                                                                                                                                                                                                                                                                                                                                                                                                                                                                                                                                                                                                 |
|-------------------------------|-----------------------------------------------------------------------------------------------------------------------------------------------------------------------------------------------------------------------------------------------------------------------------------------------------------------------------------------------------------------------------------------------------------------------------------------------------------------------------------------------------------------------------------------------------------------------------------------------------------------------------------------------------------------|
| Journal:                      | <i>BMJ Open</i>                                                                                                                                                                                                                                                                                                                                                                                                                                                                                                                                                                                                                                                 |
| Manuscript ID                 | bmjopen-2019-032443                                                                                                                                                                                                                                                                                                                                                                                                                                                                                                                                                                                                                                             |
| Article Type:                 | Protocol                                                                                                                                                                                                                                                                                                                                                                                                                                                                                                                                                                                                                                                        |
| Date Submitted by the Author: | 19-Jun-2019                                                                                                                                                                                                                                                                                                                                                                                                                                                                                                                                                                                                                                                     |
| Complete List of Authors:     | Kim, Ju Chan; Seoul National University Hospital<br>Lee, Shi-Uk; Seoul National University Seoul Metropolitan Government Boramae Medical Center, Department of Rehabilitation Medicine<br>Jung, Se Hee; Seoul National University Seoul Metropolitan Government Boramae Medical Center, Department of Rehabilitation Medicine<br>Lim, Jae-Young; Seoul National University Bundang Hospital<br>Kim, Dong Hyun; Seoul National University Seoul Metropolitan Government Boramae Medical Center, Department of Radiology<br>Lee, Sang Yoon; Seoul National University Seoul Metropolitan Government Boramae Medical Center, Department of Rehabilitation Medicine |
| Keywords:                     | Sarcopenia, Spine < ORTHOPAEDIC & TRAUMA SURGERY, Paraspinal Muscles, Lumbosacral Region                                                                                                                                                                                                                                                                                                                                                                                                                                                                                                                                                                        |
|                               |                                                                                                                                                                                                                                                                                                                                                                                                                                                                                                                                                                                                                                                                 |

SCHOLARONE™  
Manuscripts

# 1 Sarcopenia of Spine (SarcoSpine): A Prospective Cohort Study

## 2 Protocol

3 Ju Chan Kim<sup>1</sup>, Shi-Uk Lee<sup>2</sup>, Se Hee Jung<sup>2</sup>, Jae-Young Lim<sup>3</sup>, Dong Hyun Kim<sup>4</sup>, Sang  
4 Yoon Lee<sup>2</sup>

5 1 Department of Rehabilitation Medicine, Seoul National University College of  
6 Medicine, Seoul National University Hospital, Seoul, Republic of Korea

7 2 Department of Rehabilitation Medicine, Seoul National University College of  
8 Medicine, SMG-SNU Boramae Medical Center, Seoul, Republic of Korea

9 3 Department of Rehabilitation Medicine, Seoul National University College of  
10 Medicine, Seoul National University Bundang Hospital, Seongnam-si, Gyeonggi-do,  
11 Republic of Korea

12 4 Department of Radiology, Seoul National University College of Medicine, SMG-  
13 SNU Boramae Medical Center, Seoul, Republic of Korea

14  
15 Address correspondence to Sang Yoon Lee, MD, PhD

16 Department of Rehabilitation Medicine, Seoul National University College of  
17 Medicine, SMG-SNU Boramae Medical Center, 20 Boramae-ro 5-gil, Dongjak-gu,  
18 Seoul, 07061, Republic of Korea

19 Tel: +82 2 870 2673; Fax: +82 2 831 0714

20 Email address: [rehabilee@gmail.com](mailto:rehabilee@gmail.com)

1  
2  
3  
4  
5  
6  
7  
8  
9  
10  
11  
12  
13  
14  
15  
16  
17  
18  
19  
20  
21  
22  
23  
24  
25  
26  
27  
28  
29  
30  
31  
32  
33  
34  
35  
36  
37  
38  
39  
40  
41  
42  
43  
44  
45  
46  
47  
48  
49  
50  
51  
52  
53  
54  
55  
56  
57  
58  
59  
60

21 Word count: 3306

22

For peer review only

## 23 **ABSTRACT**

24 **Introduction:** Sarcopenia in the lumbar paraspinal muscles is receiving renewed  
25 attention as a cause of spinal degeneration. However, there are few studies on the  
26 precise concept and diagnostic criteria for spinal sarcopenia. Here, we develop the  
27 concept of spinal sarcopenia in community-dwelling healthy, elderly people. In  
28 addition, we aim to observe the natural aging process of paraspinal and back muscle  
29 strength and investigate the association between conventional sarcopenic indices  
30 and spinal sarcopenia.

31 **Methods and analysis:** This is a prospective observational cohort study with 120  
32 healthy community-dwelling, elderly people over 4 years. All subjects will be  
33 recruited in no sarcopenia, possible sarcopenia, or sarcopenia groups. The primary  
34 outcomes of this study are isokinetic back muscle strength and lumbar paraspinal  
35 muscle quantity and quality evaluated using lumbar spine magnetic resonance  
36 imaging. Conventional sarcopenic indices and spine specific outcomes such as  
37 spinal sagittal balance, back performance scale, and Sorenson test will also be  
38 assessed. The data will be analysed using the intention-to-treat principle.

39 **Ethics and dissemination:** Before screening, all participants will be provided with  
40 oral and written information. Ethical approval has already been obtained from all  
41 participating hospitals. The study results will be disseminated in peer-reviewed  
42 publications and conference presentations.

43 **Trial registration number:** NCT03962530

## 44 STRENGTHS AND LIMITATIONS OF THIS STUDY

- 45 ● This study is a prospective cohort study in healthy community-dwelling  
46 elderly people, to develop the concept of spinal sarcopenia, by observing the  
47 natural aging process of paraspinal muscle and back muscle strength and  
48 investigating the association between conventional sarcopenic indices and  
49 spinal sarcopenia.
- 50 ● Standardised data evaluation for sarcopenia and the function of spinal  
51 extensor muscles will be used for the analysis with an application of relevant  
52 statistical methods.
- 53 ● Sample size was evaluated based on calculation of feasibility study due to  
54 the absence of previous literature concerning isokinetic back muscle strength  
55 or lumbar paraspinal muscle quantity.

## 57 INTRODUCTION

58  
59 Sarcopenia is the age-related loss of skeletal muscle mass and function. It is a  
60 problem of not only muscle mass, but also muscle strength and performance.<sup>1,2</sup> It  
61 can also be defined as a syndrome characterized by progressive and generalized  
62 loss of skeletal muscle mass and strength with a risk of adverse outcomes such as  
63 physical disability, poor quality of life, and death.<sup>3</sup> The loss of muscle mass plays an  
64 important role in the frailty process of elderly people, being a key player of its latent  
65 phase and explaining many aspects of the frailty status itself.<sup>4</sup>

66  
67 Does Sarcopenia affect the spine? It is not difficult to answer the question if we think  
68 about the anatomy of the spine. While skeletal bone is the frame, and there are  
69 neural tissues inside the spinal canal, almost all surrounding tissues are skeletal  
70 muscles. There are huge extensor muscles at the posterior part of the spine and  
71 iliopsoas muscles also exist bilaterally around the spine. Thus, it is inevitable for  
72 sarcopenia to impact the spine. Receiving renewed attention is sarcopenia of the  
73 lumbar paraspinal muscles as a cause of spinal degeneration. Both the atrophy and  
74 fatty change of paraspinal muscles originating from sarcopenia on lumbar  
75 paraspinal, are also known to be associated with functional disorders and chronic  
76 back pain.<sup>5</sup> We want to suggest classifying this phenomenon as “spinal sarcopenia”.  
77 However, there are few studies on the precise concept and diagnostic criteria for  
78 spinal sarcopenia and no clinical trials to determine whether it can be treated or

1  
2  
3  
4 79 prevented by strengthening exercise or nutritional support.  
5  
6  
7

8 80

9  
10 81 Classical sarcopenia indices proposed by several sarcopenia working groups<sup>6,7</sup> to  
11  
12 82 date cannot be used to diagnose spinal sarcopenia. While feasible, inexpensive, and  
13  
14 83 less radiation-exposed tools such as dual energy X-ray absorptiometry have been  
15  
16 84 used to measure appendicular skeletal muscle mass, paraspinal muscle assessment  
17  
18 85 still requires the use of spinal computed tomography (CT) or magnetic resonance  
19  
20 86 imaging (MRI). In addition, spinal extensor strength measurement is necessary to  
21  
22 87 confirm the function of the lumbar paraspinal muscle, but isokinetic strength  
23  
24 88 measuring equipment for accurate measurement is not as feasible as a  
25  
26 89 dynamometer of hand-grip strength to evaluate sarcopenia. Furthermore, many  
27  
28 90 elderly people may experience pain during the measurement of spinal extension  
29  
30 91 strength.  
31  
32  
33  
34  
35  
36  
37  
38  
39

40 92

41 93 Therefore, it is necessary to develop a simple, accessible, and clinically meaningful  
42  
43 94 measurement index to confirm the function of spinal extensor muscles. In this  
44  
45 95 prospective cohort study, we will investigate the basic data of sarcopenia and  
46  
47 96 physical function as well as spine imaging (MRI and X-ray), back performance,  
48  
49 97 spinal sagittal balance, and back extensor strength in 120 healthy elderly people.  
50  
51 98 Based on this, we will analyse the correlation between baseline sarcopenia, spinal  
52  
53 99 functional index, spinal sagittal balance index, and physical function. Furthermore,  
54  
55 100 we will observe the natural aging process of these indicators through long-term  
56  
57  
58  
59  
60



1  
2  
3  
4 101 follow-up over 4 years.  
5  
6  
7 102  
8  
9

10 103 **Objectives**

- 13 104 1. To develop the concept of spinal sarcopenia in community-dwelling healthy  
15 105 elderly people.  
17  
18 106 2. In addition, we aim to observe the natural aging process of paraspinal muscle  
20 107 and back extensor strength and investigate the association between  
22 108 conventional sarcopenic indices and spinal sarcopenia.  
23  
24  
25  
26  
27 109  
28  
29  
30 110  
31  
32

33 111 **METHOD AND ANALYSIS**

34  
35  
36 112  
37  
38  
39 113 **Study design**

40  
41  
42 114 This is a prospective observational cohort study with 120 healthy community-  
44 115 dwelling elderly people in a single center (SMG-SNU Boramae Medical Center).  
46 116 Individual follow-up will last 4 years.  
47  
48  
49

50 117  
51  
52  
53 118 **Participants and eligibility criteria**

54  
55  
56 119 Elderly people ( $\geq 65$  years old) who are community-dwellers and able to walk with or  
57  
58  
59  
60

1  
2  
3  
4 120 without assistive devices will be included. Participants who have experienced the  
5  
6 121 following will be excluded: 1) low back pain with moderate severity (numeric rating  
7  
8 122 scale 5 and over); 2) history of any types of lumbar spine surgery; 3) history of hip  
9  
10 123 fracture surgery and arthroplasty of hip or knee; 4) contraindications for MRI (such  
11  
12 124 as cardiac pacemaker, implanted metallic objects, and claustrophobia); 5) disorders  
13  
14 125 in central nervous system (such as stroke, parkinsonism, spinal cord injury); 6)  
15  
16 126 cognitive dysfunction (Mini Mental State Examination score < 24); 7) communication  
17  
18 127 disorder (such as severe hearing loss); 8) severe cardiopulmonary disease (such as  
19  
20 128 heart failure with New York Heart Association Class III or IV); 9) uncontrolled chronic  
21  
22 129 disease (such as hypertension with systolic blood pressure >165 and diastolic blood  
23  
24 130 pressure >95); 10) musculoskeletal condition affecting physical function (such as  
25  
26 131 amputation of limb); 11) long-term use of corticosteroids due to inflammatory  
27  
28 132 disease; 12) malignancy requiring treatment within 5 years; and 13) other medical  
29  
30 133 conditions which need active treatment; patients who refuse to participate in a study  
31  
32 134 will also be excluded.  
33  
34  
35  
36  
37  
38

39 135 Sarcopenia can be divided by two stages: 1) possible sarcopenia (PS) defined by  
40  
41 136 low handgrip strength and/or low gait speed and 2) sarcopenia (SA) confirmed by  
42  
43 137 low handgrip strength and/or low gait speed and low muscle mass defined by the  
44  
45 138 consensus report of the Asian working group for sarcopenia.<sup>6</sup> A no sarcopenia (NS)  
46  
47 139 group is added to this classification, and the study participants are classified into  
48  
49 140 three groups (NS, PS, and SA) after the screening tests (Figure 1).  
50  
51  
52  
53  
54  
55  
56  
57  
58  
59  
60

## 142 **Outcomes measures**

### 143 Primary outcome measures

#### 144 *1. Isokinetic back muscle strength*

145 The investigators will use the isokinetic dynamometer (Biodex multi-joint  
146 system, Biodex Corporation, Shirley, NY, USA) to measure the torque of the  
147 back extensors. Briefly, the examination will be performed by seating the  
148 patient comfortably in the device, fixing both the thighs and the back to the  
149 chair using a strap, and asking the patient to hold the handle placed near the  
150 front, at the chest, to measure upper limb and hip joint motions. The  
151 dynamometer axis will be located on the anterior superior iliac spine of the  
152 patient's pelvis. All patients will be instructed to flex and extend the back five  
153 times at an angular velocity of 60°/sec as a warm-up before the examination.  
154 During the examination, patients will be instructed to execute flexion and  
155 extension of the back, with a maximum effort, 10 times at an angular velocity  
156 of 60°/sec. The device will measure the peak torque (PT) (Nm) and the peak  
157 torque per body weight (PT/Bwt) (Nm/kg).<sup>8</sup>

#### 158 *2. Lumbar paraspinal muscle quantity and quality*

159 Lumbar spine MRI will be performed using a 1.5-T scanner (Achieva 1.5 T;  
160 Philips Healthcare, Netherlands). Subjects will be placed in the supine  
161 position with the lumbar spine in a neutral position and a pillow under their  
162 head and knees. The imaging protocol will include sagittal T2-weighted fast  
163 spin echo imaging (repetition time, 3,200 ms/echo; echo time, 100 ms; echo-  
164 train length, 20; section thickness, 4 mm; and field of view, 300 × 300 mm)

1  
2  
3  
4 165 and axial T2-weighted fast spin echo imaging (repetition time, 3,500 ms/echo;  
5  
6 166 echo time, 100 ms; echo-train length, 20; section thickness, 4 mm; and field  
7  
8  
9 167 of view, 200 × 200 mm). Axial images will be obtained for each lumbar  
10  
11 168 intervertebral level (T12/L1-L5/S1) parallel to the vertebral endplates with five  
12  
13 169 slices at each intervertebral level.

14  
15 170 The measurement of the cross sectional area (CSA) and fatty infiltration ratio  
16  
17 171 (FI %) of the paraspinal muscles (erector spinae [ES], multifidus [MF], and  
18  
19 172 psoas major [PM]) will be performed with axial T2-weighted images using a  
20  
21 173 radiological workstation (MEDIP; Medical IP, Seoul, South Korea) specially  
22  
23 174 designed for such purposes. The measurement of ES and MF will be  
24  
25 175 performed from the level of L1/L2 to L5/S1 and that of PM will be performed  
26  
27 176 at the level of L4/5. The CSA will be measured by manually constructing free-  
28  
29 177 draw points around the outer margins of the individual muscles using touch  
30  
31 178 screen LCD monitor (XPS 15 9570, Dell, Round Rock, TX, USA) and digital  
32  
33 179 touch screen pen (PN556W Dell Active Pen, Dell, Round Rock, TX, USA).  
34  
35 180 The FI % is defined as the percentage of fatty infiltration area, which is  
36  
37 181 obtained by dividing the fatty infiltration area by the total area. The CSA and  
38  
39 182 FI % of paraspinal muscles will be separately measured on the bilateral sides,  
40  
41 183 and mean values will be calculated.<sup>9</sup>

## 42 43 44 45 46 47 48 49 50 185 Secondary outcome measures

### 51 52 186 1. *Conventional sarcopenic indices*

#### 53 54 55 187 A. Appendicular skeletal muscle mass (ASM): Both dual-energy X-ray

1  
2  
3  
4 188 absorptiometry (Lunar iDXA for Bone Health; GE Healthcare,  
5  
6 189 Schenectady, NY, USA) and bio-impedance analysis (InBody 720;  
7  
8  
9 190 Biospace, Seoul, South Korea) will be used to analyse body composition  
10  
11 191 including lean body and fat masses. ASM will be calculated by obtaining  
12  
13 192 the sum of the lean mass in bilateral upper and lower extremities<sup>10</sup> and  
14  
15 193 standardized by being divided by the squared height value ( $ASM/Ht^2$ ,  
16  
17  $kg/m^2$ ).  
18 194  
19  
20 195 B. Handgrip strength: It will be measured using a hand-grip dynamometer  
21  
22 196 (T.K.K.5401; Takei Scientific Instruments, Tokyo, Japan)<sup>11</sup>, as described  
23  
24 197 previously<sup>12</sup>. Briefly, while sitting in a straight-backed chair with their feet  
25  
26 198 flat on the floor, patients will be asked to adduct and neutrally rotate the  
27  
28 199 shoulder, flex the elbow to 90°, and place the forearm in a neutral  
29  
30 200 position, with the wrist between 0° and 30° extension and between 0° and  
31  
32 201 15° ulnar deviation. Subjects will be instructed to squeeze the handle as  
33  
34 202 hard as possible for 3 seconds, and the maximum contraction force (Kg)  
35  
36 203 will be recorded.  
37  
38  
39  
40  
41 204 C. Short physical performance battery (SPPB): Functional examination  
42  
43 205 using SPPB derived from three objective physical function tests (i.e., the  
44  
45 206 time taken to cover 4 m at a comfortable walking speed, time taken to  
46  
47 207 stand from sitting in a chair 5 times without stopping, and ability to  
48  
49 208 maintain balance for 10 s in three different foot positions at progressively  
50  
51 209 more challenging levels).<sup>13</sup> A score from 0 to 4 will be assigned to  
52  
53 210 performance on each task, with higher scores indicating better lower  
54  
55  
56  
57  
58  
59  
60

1  
2  
3  
4 211 body function.  
5

6 212 2. *Spine specific outcomes*  
7

8  
9 213 A. Isometric back muscle strength: Similarly, with the isokinetic back muscle  
10  
11 214 strength test, we will perform the isometric back muscle strength test  
12  
13 215 using a handheld dynamometer (PowerTrack II; JTECH Medical, Salt  
14  
15 216 Lake City, UT, USA). This will involve the participant standing in full  
16  
17 217 extension with their back to a wall, midway between two vertically  
18  
19 218 oriented anchor rails, and feet flat on the floor with heels touching the  
20  
21 219 wall. An inelastic belt will be looped through the anchor rails, and secured  
22  
23 220 firmly around the participant, 1 cm below the anterior superior iliac  
24  
25 221 spines, in order to restrain movement and maintain participant contact  
26  
27 222 with the wall during the test. To standardise posture, arms will be crossed  
28  
29 223 over the chest, with fingertips level with the contralateral shoulders. The  
30  
31 224 participant will be instructed to flex forward approximately 15° at the hips  
32  
33 225 so the handheld dynamometer can be positioned posterior to the spinous  
34  
35 226 process of the seventh thoracic vertebrae. In this way, counter pressure  
36  
37 227 will be provided by the fixed wall behind the participants' back so that  
38  
39 228 variations in resistance by an examiner will be avoided.<sup>14</sup>  
40  
41  
42  
43  
44

45 229 B. Spinal sagittal balance (SSB): For each participant, one lateral  
46  
47 230 radiograph of the whole spine will be made and digitized. All  
48  
49 231 measurements will be performed by means of imaging software  
50  
51 232 (INFINITT PACS M6; INFINITT Healthcare, Seoul, South Korea), as  
52  
53 233 previously described.<sup>15,16</sup> Briefly, the following spinopelvic radiographic  
54  
55  
56  
57  
58  
59  
60

1  
2  
3  
4 234 parameters will be analysed: sacral slope (SS), pelvic incidence (PI),  
5  
6 235 pelvic tilt (PT), lumbar lordosis (LL), thoracic kyphosis (TK), the ratio of LL  
7  
8  
9 236 to PI (LL/PI), PI-LL mismatch (PI-LL; the difference between the pelvic  
10  
11 237 incidence and lumbar lordosis), and sagittal vertical axis (SVA). PI-LL will  
12  
13 238 be used as the primary outcomes of SSB.<sup>17</sup>

15  
16 239 C. Back performance scale (BPS): BPS consists of five tests: Sock Test, the  
17  
18 240 Pick-up Test, the Roll-up Test, the Fingertip-to-Floor Test, and the Lift  
19  
20 241 Test. The 5 tests comprising the BPS demonstrate associations with  
21  
22 242 each other, and each test contributes to high internal consistency,  
23  
24 243 implying that the tests share a common characteristic in measuring  
25  
26 244 physical performance.<sup>18</sup> The BPS sum score (0-15) is calculated by  
27  
28 245 adding the individual scores of the 5 tests.

31  
32 246 D. Sorensen test: It is the most widely used test in published studies  
33  
34 247 evaluating the isometric endurance of the trunk extensor muscles. The  
35  
36 248 test consists of measuring the amount of time a person can hold the  
37  
38 249 unsupported upper body in a horizontal prone position with the lower  
39  
40 250 body fixed to the examining table.<sup>19</sup>

### 43 251 3. *Other functional outcomes*

45  
46 252 A. Berg balance scale (BBS): Balance and fall risk will be assessed using  
47  
48 253 BBS (range: 0–56; a lower score indicates a worse outcome).<sup>20</sup>

50  
51 254 B. Quality of life (QOL): It will be evaluated using the Euro Quality of Life  
52  
53 255 Questionnaire five-dimensional classification (EQ-5D; range: 0–1; a lower  
54  
55 256 score indicates a worse outcome).<sup>21</sup>

1  
2  
3  
4 257 C. Activities of daily living (ADLs): ADLs will be determined using the Korean  
5  
6 258 version of the modified Barthel index<sup>22</sup> (K-MBI; range: 0–100; a lower  
7  
8 score indicates a worse outcome) and the Korean version of the  
9 259  
10 Instrumental ADL (K-IADL; range: 0–3; a higher score indicates a worse  
11 260  
12 outcome).<sup>23</sup>  
13 261

14  
15 262 D. Frailty: It will be assessed based on fatigue, resistance, ambulation,  
16  
17 illnesses, and loss of weight (FRAIL) using the Korean version of the  
18 263  
19 FRAIL scale (K-FRAIL; range: 0–5; a lower score indicates a worse  
20 264  
21 outcome).<sup>24</sup>  
22 265  
23  
24

#### 25 266 4. Serum examination

26  
27 267 A. Serum chemistry, complete blood counts (CBC), blood urea nitrogen and  
28  
29 creatinine will be obtained.  
30 268

31 269 B. Interleukin-6 (IL-6) level will be quantified by Green-Cross laboratory (GC  
32  
33 lab, Seoul, Korea) using standard procedures.  
34 270  
35

36 271  
37  
38 272 All outcome variables will be collected at baseline, 2 and 4 years. However, L-S  
39  
40 spine MRI for lumbar paraspinal muscle quantity and quality will be performed only  
41 273  
42 at baseline (Table 1).  
43 274  
44  
45

46 275

47  
48 276

49  
50 277

51  
52 278



279 Table 1. Overview of the outcome measures and time points of assessment

|                                       | Screening | Baseline | 2 years | 4 years |
|---------------------------------------|-----------|----------|---------|---------|
| <b>Eligibility</b>                    | X         |          |         |         |
| <b>Eligibility confirmation</b>       |           | X        |         |         |
| <b>Informed consent</b>               |           | X        |         |         |
| <b>Demographic information</b>        |           | X        |         |         |
| <b>Medical History</b>                |           | X        | X       | X       |
| <b>Body composition (image study)</b> |           |          |         |         |
| Wholebody DEXA and BIA                | BIA       | DEXA     | X       | X       |
| Whole spine X-ray (lateral)           |           | X        | X       | X       |
| L-S spine MRI                         |           | X        |         |         |
| <b>Function and performance</b>       |           |          |         |         |
| Handgrip strength                     | X         | X        | X       | X       |
| Gait function                         | X         | X        | X       | X       |
| SPPB                                  |           | X        | X       | X       |
| Physical activity                     |           | X        | X       | X       |
| Balance function                      |           | X        | X       | X       |
| <b>Spine performance</b>              |           |          |         |         |
| Isokinetic back muscle strength       |           | X        | X       | X       |
| Isometric back muscle strength        |           | X        | X       | X       |
| Sorenson test                         |           | X        | X       | X       |
| Back performance scale                |           | X        | X       | X       |
| <b>Others</b>                         |           |          |         |         |
| Fear for fall                         |           | X        | X       | X       |
| Nutritional status                    |           | X        | X       | X       |
| Frailty                               |           | X        | X       | X       |
| QoL questionnaire                     |           | X        | X       | X       |
| Activity daily living                 |           | X        | X       | X       |
| Laboratory test with biomarker        |           | X        | X       | X       |

1  
2  
3  
4 280 DEXA, Dual-energy X-ray absorptiometry; BIA, Bio-impedance analysis; MRI,  
5  
6 281 Magnetic resonance imaging; SPPB, Short Physical Performance Battery, QoL,  
7  
8  
9 282 Quality of life.

10  
11  
12 283  
13  
14  
15  
16  
17  
18  
19  
20  
21  
22  
23  
24  
25  
26  
27  
28  
29  
30  
31  
32  
33  
34  
35  
36  
37  
38  
39  
40  
41  
42  
43  
44  
45  
46  
47  
48  
49  
50  
51  
52  
53  
54  
55  
56  
57  
58  
59  
60

For peer review only

## 284 **Data analysis**

285 Data will be collected using a standardised data entry form and entered into the data  
286 management system. The intention-to-treat principle will be used for data analysis.  
287 Participant characteristics will be described using means and standard deviations for  
288 continuous data and frequencies and percentages for categorical data. The three  
289 groups will be compared using an analysis of variance (ANOVA) or the non-  
290 parametric equivalence, a Kruskal–Wallis test, if required. To compare paired data  
291 (intra-group) between two different points, we will use repeated-measures ANOVA  
292 and Friedman tests for continuous and non-parametric data, respectively. Statistical  
293 significance will be defined as a P value < 0.05. All statistical analyses will be  
294 performed using SPSS version 19.0 for Windows (IBM Corp., Chicago, IL, USA).

## 296 **Sample size**

297 We intended to perform the sample size calculation based on the difference in mean  
298 of isokinetic back muscle strength or lumbar paraspinal muscle quantity among  
299 groups. However, there was no literature available concerning isokinetic back  
300 muscle strength or lumbar paraspinal muscle quantity in general practices or  
301 hospitals, let alone effect sizes. Therefore, we based our sample size calculation on  
302 feasibility. A total of 120 subjects will be recruited in order to ensure 20 male and 20  
303 female participants per group, in three groups (NS, PS, and SA groups) based on  
304 sarcopenia.

## 306 **Patient and public involvement**

307 While participants were not involved in the development of the research question  
308 and the selection of outcome measures, their needs and preferences were  
309 considered throughout the process. Feedback to the participants regarding scientific  
310 results, will be organised on each study site.

311

## 312 **ETHICS AND DISSEMINATION**

313 This protocol is approved by the institutional review board of Seoul Metropolitan  
314 Government Seoul National University (SMG-SNU) Boramae Medical Center (IRB  
315 No. 20-2019-19). The study will be performed in accordance with the relevant  
316 guidelines of the Declaration of Helsinki, 1964, as amended in Tokyo, 1975; Venice,  
317 1983; Hong Kong, 1989; and Somerset West, 1996.<sup>25</sup> Written informed consent for  
318 all interventions and examinations will be obtained at patient admission. The Ethics  
319 Board will be informed of all serious adverse events and any unanticipated adverse  
320 effects that occur during the study. The study protocol has been registered at  
321 Clinicaltrials.gov and will be updated. The study methods are in accordance with the  
322 SPIRIT guidelines for reporting randomised trials.<sup>26</sup> Direct access to the source data  
323 will be provided for monitoring, audits, Research Ethics Committee  
324 (REC)/Institutional Review Board (IRB) review, and regulatory authority inspections  
325 during and after the study. All patient information will be coded anonymously, with  
326 only the study team having access to the original data. The study results will be  
327 disseminated in peer-reviewed publications and conference presentations.

328

329

## DISCUSSION

331

332 Skeletal muscle mass measurement to define sarcopenia has mainly been based on  
333 the sum of muscle mass in the limbs (appendicular limb muscle mass). However the  
334 question remains whether this sum of limb muscle mass is associated with muscle  
335 function throughout the whole body. Lee et al. reported that degenerative arthritis of  
336 the knee joint was associated with only lower limb muscle mass, but not with upper  
337 limb muscle mass.<sup>27</sup> Recently, Jeon et al. also suggested that the sum of limb  
338 muscle mass was not correlated with the radiological degenerative changes of the  
339 lumbar spine and hip joint.<sup>28</sup> Therefore, site-specific muscle mass investigation is  
340 necessary to evaluate the effect of skeletal muscle on specific regions.

341 Currently, SSB is an important indicator of outcomes of lumbar spine surgery,<sup>29</sup> and  
342 even non-operative treatment of spinal stenosis.<sup>30</sup> While SSB can be affected by  
343 sex<sup>31</sup> and ethnicity,<sup>32</sup> aging is the most important cause of spinal sagittal  
344 imbalance.<sup>33</sup> Decreased lumbar lordosis is an important cause of spinal sagittal  
345 imbalance, and it is known to originate from the wedging or decreased height of the  
346 intervertebral discs in the absence of vertebral compression fractures.<sup>34,35</sup> However,  
347 spinal sagittal imbalance is difficult to explain only by the height of the intervertebral  
348 discs or vertebral bodies. Therefore, we can hypothesize that spinal sarcopenia is

1  
2  
3  
4 349 one of the causes of spinal sagittal imbalance which the current cohort study will  
5  
6 350 prove.  
7  
8

9  
10 351 Several specific assessments such as cross-sectional area of paraspinal muscles,  
11  
12 352 back muscle strength, and back performance test are required to evaluate spinal  
13  
14 353 sarcopenia. However, unlike limb skeletal muscles, the functional evaluation of the  
15  
16 354 spine corresponding to the center of the body is not practical. Thus, this cohort study  
17  
18 355 will investigate the value of SSB as a substitute for back muscle strength and  
19  
20 356 performance measurement. In other words, if back muscle strength and functional  
21  
22 357 impairment are directly related to the spinal sagittal imbalance, a simple measurable  
23  
24 358 SSB may be a useful index to represent spinal muscle function.  
25  
26  
27  
28

29 359

### 30 31 32 360 **Authors' contributions**

33  
34  
35 361 SYL conceived the study and is the principal investigator. JCK, SUL, SHJ, JYL, and  
36  
37 362 DHL contributed to the development of the study. All authors approved the version to  
38  
39 363 be published and are responsible for its accuracy.  
40  
41  
42

43 364

### 44 45 46 365 **Funding**

47  
48  
49  
50 366 This work was supported by the National Research Foundation of Korea (NRF) grant  
51  
52 367 funded by the Korea government (MSIT) (No. 2019R1C1C100632).  
53  
54

55  
56 368  
57  
58  
59  
60

1  
2  
3  
4  
5  
6  
7  
8  
9  
10  
11  
12  
13  
14  
15  
16  
17  
18  
19  
20  
21  
22  
23  
24  
25  
26  
27  
28  
29  
30  
31  
32  
33  
34  
35  
36  
37  
38  
39  
40  
41  
42  
43  
44  
45  
46  
47  
48  
49  
50  
51  
52  
53  
54  
55  
56  
57  
58  
59  
60

369 **Competing interests**

370 None declared

For peer review only

1  
2  
3  
4 372 **REFERENCES**  
5  
6  
7

- 8 373 1. Doherty TJ. Invited review: Aging and sarcopenia. *J Appl Physiol* (1985)  
9  
10 374 2003;95:1717-27.  
11  
12 375 2. Morley JE. Sarcopenia: diagnosis and treatment. *J Nutr Health Aging*  
13  
14 376 2008;12:452-6.  
15  
16 377 3. Delmonico MJ, Harris TB, Lee JS, et al. Alternative definitions of sarcopenia,  
17  
18 378 lower extremity performance, and functional impairment with aging in older men and  
19  
20 379 women. *J Am Geriatr Soc* 2007;55:769-74.  
21  
22 380 4. Pedone C, Costanzo L, Cesari M, Bandinelli S, Ferrucci L, Antonelli Incalzi R.  
23  
24 381 Are Performance Measures Necessary to Predict Loss of Independence in Elderly  
25  
26 382 People? *J Gerontol A Biol Sci Med Sci* 2016;71:84-9.  
27  
28 383 5. Masaki M, Ikezoe T, Fukumoto Y, et al. Association of sagittal spinal  
29  
30 384 alignment with thickness and echo intensity of lumbar back muscles in middle-aged  
31  
32 385 and elderly women. *Archives of gerontology and geriatrics* 2015;61:197-201.  
33  
34 386 6. Chen LK, Liu LK, Woo J, et al. Sarcopenia in Asia: consensus report of the  
35  
36 387 Asian Working Group for Sarcopenia. *J Am Med Dir Assoc* 2014;15:95-101.  
37  
38 388 7. Cruz-Jentoft AJ, Baeyens JP, Bauer JM, et al. Sarcopenia: European  
39  
40 389 consensus on definition and diagnosis: Report of the European Working Group on  
41  
42 390 Sarcopenia in Older People. *Age Ageing* 2010;39:412-23.  
43  
44 391 8. Lee HJ, Lim WH, Park JW, et al. The Relationship between Cross Sectional  
45  
46 392 Area and Strength of Back Muscles in Patients with Chronic Low Back Pain. *Annals*  
47  
48 393 *of rehabilitation medicine* 2012;36:173-81.  
49  
50 394 9. Sasaki T, Yoshimura N, Hashizume H, et al. MRI-defined paraspinal muscle  
51  
52  
53  
54  
55  
56  
57  
58  
59  
60



- 1  
2  
3  
4 395 morphology in Japanese population: The Wakayama Spine Study. PLoS One  
5  
6 396 2017;12:e0187765.  
7  
8  
9 397 10. Baumgartner RN, Koehler KM, Gallagher D, et al. Epidemiology of  
10  
11 398 sarcopenia among the elderly in New Mexico. American journal of epidemiology  
12  
13 399 1998;147:755-63.  
14  
15 400 11. Pedrero-Chamizo R, Albers U, Tobaruela JL, Melendez A, Castillo MJ,  
16  
17 401 Gonzalez-Gross M. Physical strength is associated with Mini-Mental State  
18  
19 402 Examination scores in Spanish institutionalized elderly. Geriatrics & gerontology  
20  
21 403 international 2013;13:1026-34.  
22  
23  
24 404 12. Ro HJ, Kim DK, Lee SY, Seo KM, Kang SH, Suh HC. Relationship Between  
25  
26 405 Respiratory Muscle Strength and Conventional Sarcopenic Indices in Young Adults:  
27  
28 406 A Preliminary Study. Annals of rehabilitation medicine 2015;39:880-7.  
29  
30  
31 407 13. Guralnik JM, Ferrucci L, Simonsick EM, Salive ME, Wallace RB. Lower-  
32  
33 408 extremity function in persons over the age of 70 years as a predictor of subsequent  
34  
35 409 disability. N Engl J Med 1995;332:556-61.  
36  
37  
38 410 14. Harding AT, Weeks BK, Horan SA, Little A, Watson SL, Beck BR. Validity  
39  
40 411 and test-retest reliability of a novel simple back extensor muscle strength test. SAGE  
41  
42 412 Open Med 2017;5:2050312116688842.  
43  
44  
45 413 15. Vialle R, Levassor N, Rillardon L, Templier A, Skalli W, Guigui P.  
46  
47 414 Radiographic analysis of the sagittal alignment and balance of the spine in  
48  
49 415 asymptomatic subjects. The Journal of bone and joint surgery American volume  
50  
51 416 2005;87:260-7.  
52  
53  
54 417 16. Buckland AJ, Ramchandran S, Day L, et al. Radiological lumbar stenosis  
55  
56  
57  
58  
59  
60

- 1  
2  
3  
4 418 severity predicts worsening sagittal malalignment on full-body standing  
5  
6 419 stereoradiographs. *The spine journal : official journal of the North American Spine*  
7  
8  
9 420 *Society* 2017.
- 10  
11 421 17. Koller H, Pfanz C, Meier O, et al. Factors influencing radiographic and clinical  
12  
13 422 outcomes in adult scoliosis surgery: a study of 448 European patients. *European*  
14  
15 423 *spine journal : official publication of the European Spine Society, the European*  
16  
17 424 *Spinal Deformity Society, and the European Section of the Cervical Spine Research*  
18  
19 425 *Society* 2016;25:532-48.
- 20  
21  
22 426 18. Strand LI, Moe-Nilssen R, Ljunggren AE. Back Performance Scale for the  
23  
24 427 assessment of mobility-related activities in people with back pain. *Phys Ther*  
25  
26 428 2002;82:1213-23.
- 27  
28  
29 429 19. Demoulin C, Vanderthommen M, Duysens C, Crielaard JM. Spinal muscle  
30  
31 430 evaluation using the Sorensen test: a critical appraisal of the literature. *Joint Bone*  
32  
33 431 *Spine* 2006;73:43-50.
- 34  
35  
36 432 20. Berg K, Wood-Dauphinee S, Williams JI. The Balance Scale: reliability  
37  
38 433 assessment with elderly residents and patients with an acute stroke. *Scand J*  
39  
40 434 *Rehabil Med* 1995;27:27-36.
- 41  
42  
43 435 21. Group TE. EuroQol-a new facility for the measurement of health-related  
44  
45 436 quality of life. *Health policy* 1990;16:199-208.
- 46  
47  
48 437 22. Jung HY, Park BK, Shin HS, et al. Development of the Korean version of  
49  
50 438 Modified Barthel Index (K-MBI): multi-center study for subjects with stroke. *Journal of*  
51  
52 439 *Korean Academy of Rehabilitation Medicine* 2007;31:283-97.
- 53  
54  
55 440 23. Won CW, Yang KY, Rho YG, et al. The development of Korean activities of  
56  
57  
58  
59  
60

- 1  
2  
3  
4 441 daily living (K-ADL) and Korean instrumental activities of daily living (K-IADL) scale.  
5  
6 442 Journal of the Korean Geriatrics Society 2002;6:107-20.  
7  
8  
9 443 24. Jung HW, Yoo HJ, Park SY, et al. The Korean version of the FRAIL scale:  
10  
11 444 clinical feasibility and validity of assessing the frailty status of Korean elderly. Korean  
12  
13 445 J Intern Med 2016;31:594-600.  
14  
15 446 25. Dale O, Salo M. The Helsinki Declaration, research guidelines and  
16  
17 447 regulations: present and future editorial aspects. Acta anaesthesiologica  
18  
19 448 Scandinavica 1996;40:771-2.  
20  
21  
22 449 26. Moher D, Hopewell S, Schulz KF, et al. CONSORT 2010 explanation and  
23  
24 450 elaboration: updated guidelines for reporting parallel group randomised trials.  
25  
26 451 International journal of surgery 2012;10:28-55.  
27  
28  
29 452 27. Lee SY, Ro HJ, Chung SG, Kang SH, Seo KM, Kim DK. Low Skeletal Muscle  
30  
31 453 Mass in the Lower Limbs Is Independently Associated to Knee Osteoarthritis. PLoS  
32  
33 454 One 2016;11:e0166385.  
34  
35  
36 455 28. Jeon H, Lee SU, Lim JY, Chung SG, Lee SJ, Lee SY. Low skeletal muscle  
37  
38 456 mass and radiographic osteoarthritis in knee, hip, and lumbar spine: a cross-  
39  
40 457 sectional study. Aging Clin Exp Res 2019.  
41  
42  
43 458 29. Hikata T, Watanabe K, Fujita N, et al. Impact of sagittal spinopelvic alignment  
44  
45 459 on clinical outcomes after decompression surgery for lumbar spinal canal stenosis  
46  
47 460 without coronal imbalance. Journal of neurosurgery Spine 2015;23:451-8.  
48  
49  
50 461 30. Beyer F, Geier F, Bredow J, Oppermann J, Eysel P, Sobottke R. Influence of  
51  
52 462 spinopelvic parameters on non-operative treatment of lumbar spinal stenosis.  
53  
54 463 Technology and health care : official journal of the European Society for Engineering

1  
2  
3  
4 464 and Medicine 2015;23:871-9.  
5

6 465 31. Sinaki M, Itoi E, Rogers JW, Bergstralh EJ, Wahner HW. Correlation of back  
7  
8 466 extensor strength with thoracic kyphosis and lumbar lordosis in estrogen-deficient  
9  
10 467 women. American journal of physical medicine & rehabilitation 1996;75:370-4.  
11  
12

13 468 32. Zhu Z, Xu L, Zhu F, et al. Sagittal alignment of spine and pelvis in  
14  
15 469 asymptomatic adults: norms in Chinese populations. Spine 2014;39:E1-6.  
16  
17

18 470 33. Gelb DE, Lenke LG, Bridwell KH, Blanke K, McEneaney KW. An analysis of  
19  
20 471 sagittal spinal alignment in 100 asymptomatic middle and older aged volunteers.  
21  
22 472 Spine 1995;20:1351-8.  
23  
24

25 473 34. Takeda N, Kobayashi T, Atsuta Y, Matsuno T, Shirado O, Minami A.  
26  
27 474 Changes in the sagittal spinal alignment of the elderly without vertebral fractures: a  
28  
29 475 minimum 10-year longitudinal study. Journal of orthopaedic science : official journal  
30  
31 476 of the Japanese Orthopaedic Association 2009;14:748-53.  
32  
33

34 477 35. Frobin W, Brinckmann P, Kramer M, Hartwig E. Height of lumbar discs  
35  
36 478 measured from radiographs compared with degeneration and height classified from  
37  
38 479 MR images. European radiology 2001;11:263-9.  
39  
40

41  
42 480  
43  
44  
45  
46  
47  
48  
49  
50  
51  
52  
53  
54  
55  
56  
57  
58  
59  
60

1  
2  
3  
4  
5  
6  
7  
8  
9  
10  
11  
12  
13  
14  
15  
16  
17  
18  
19  
20  
21  
22  
23  
24  
25  
26  
27  
28  
29  
30  
31  
32  
33  
34  
35  
36  
37  
38  
39  
40  
41  
42  
43  
44  
45  
46  
47  
48  
49  
50  
51  
52  
53  
54  
55  
56  
57  
58  
59  
60

481 **FIGURE LEGEND**

482 **Figure 1.** Flow diagram of the cohort study

For peer review only

1 **Figure 1.**

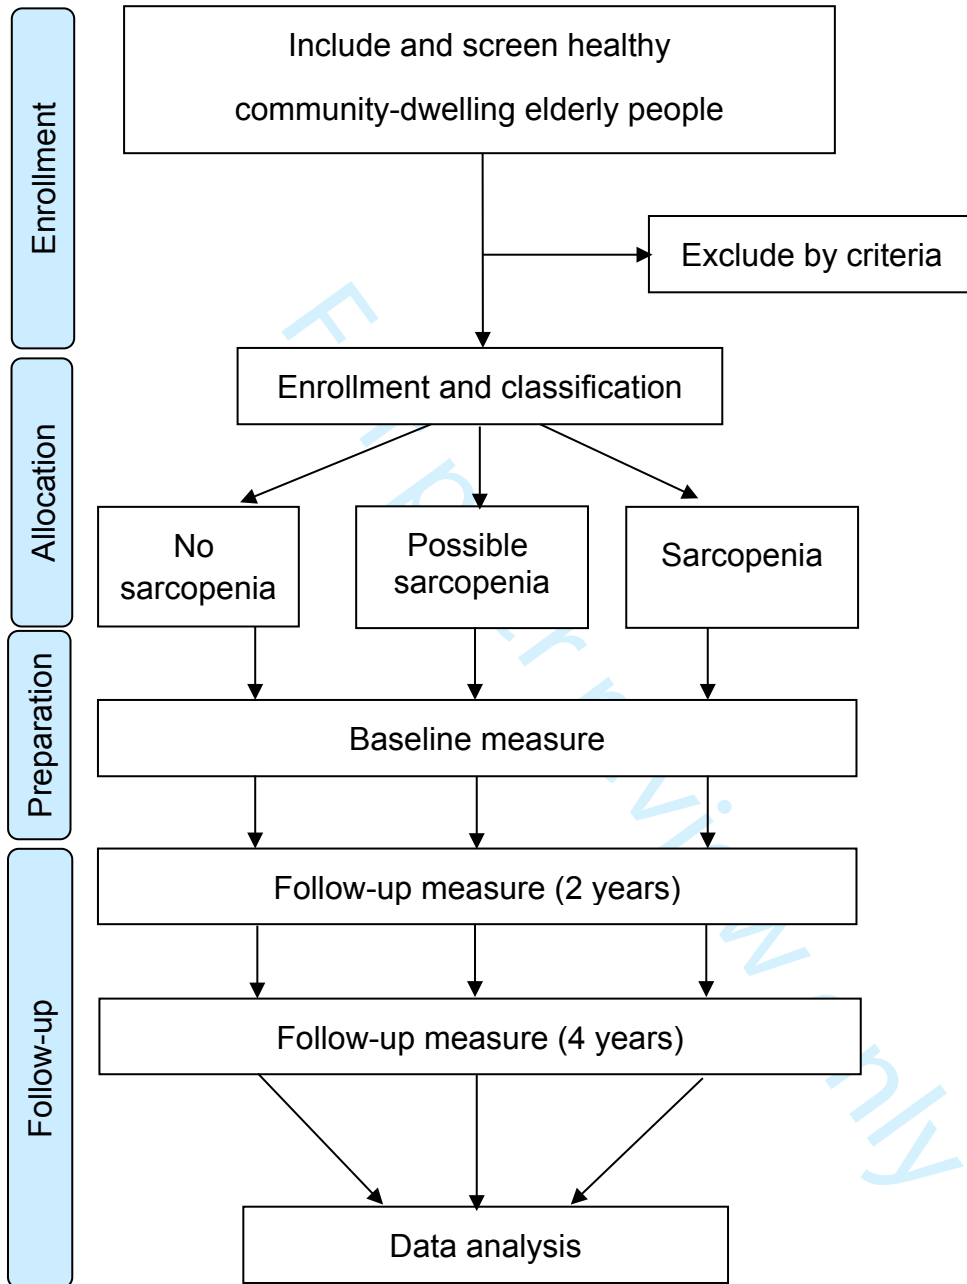

# BMJ Open

## Natural Aging Course of Paraspinal Muscle and Back Extensor Strength in Community-dwelling Older Adults (Sarcopenia of Spine, SarcoSpine): A Prospective Cohort Study Protocol

|                                 |                                                                                                                                                                                                                                                                                                                                                                                                                                                                                                                                                                                                                                                                 |
|---------------------------------|-----------------------------------------------------------------------------------------------------------------------------------------------------------------------------------------------------------------------------------------------------------------------------------------------------------------------------------------------------------------------------------------------------------------------------------------------------------------------------------------------------------------------------------------------------------------------------------------------------------------------------------------------------------------|
| Journal:                        | <i>BMJ Open</i>                                                                                                                                                                                                                                                                                                                                                                                                                                                                                                                                                                                                                                                 |
| Manuscript ID                   | bmjopen-2019-032443.R1                                                                                                                                                                                                                                                                                                                                                                                                                                                                                                                                                                                                                                          |
| Article Type:                   | Protocol                                                                                                                                                                                                                                                                                                                                                                                                                                                                                                                                                                                                                                                        |
| Date Submitted by the Author:   | 23-Jul-2019                                                                                                                                                                                                                                                                                                                                                                                                                                                                                                                                                                                                                                                     |
| Complete List of Authors:       | Kim, Ju Chan; Seoul National University Hospital<br>Lee, Shi-Uk; Seoul National University Seoul Metropolitan Government Boramae Medical Center, Department of Rehabilitation Medicine<br>Jung, Se Hee; Seoul National University Seoul Metropolitan Government Boramae Medical Center, Department of Rehabilitation Medicine<br>Lim, Jae-Young; Seoul National University Bundang Hospital<br>Kim, Dong Hyun; Seoul National University Seoul Metropolitan Government Boramae Medical Center, Department of Radiology<br>Lee, Sang Yoon; Seoul National University Seoul Metropolitan Government Boramae Medical Center, Department of Rehabilitation Medicine |
| <b>Primary Subject Heading</b>: | Geriatric medicine                                                                                                                                                                                                                                                                                                                                                                                                                                                                                                                                                                                                                                              |
| Secondary Subject Heading:      | Geriatric medicine, Rehabilitation medicine                                                                                                                                                                                                                                                                                                                                                                                                                                                                                                                                                                                                                     |
| Keywords:                       | Sarcopenia, Spine < ORTHOPAEDIC & TRAUMA SURGERY, Paraspinal Muscles, Lumbosacral Region                                                                                                                                                                                                                                                                                                                                                                                                                                                                                                                                                                        |
|                                 |                                                                                                                                                                                                                                                                                                                                                                                                                                                                                                                                                                                                                                                                 |

SCHOLARONE™  
Manuscripts

1  
2  
3  
4 **1 Natural Aging Course of Paraspinal Muscle and Back Extensor**  
5  
6  
7 **2 Strength in Community-dwelling Older Adults (Sarcopenia of Spine,**  
8  
9 **3 SarcoSpine): A Prospective Cohort Study Protocol**

10  
11  
12  
13 4 Ju Chan Kim<sup>1</sup>, Shi-Uk Lee<sup>2</sup>, Se Hee Jung<sup>2</sup>, Jae-Young Lim<sup>3</sup>, Dong Hyun Kim<sup>4</sup>, Sang  
14  
15 5 Yoon Lee<sup>2</sup>

16  
17  
18 6 1 Department of Rehabilitation Medicine, Seoul National University College of  
19  
20  
21 7 Medicine, Seoul National University Hospital, Seoul, Republic of Korea

22  
23  
24 8 2 Department of Rehabilitation Medicine, Seoul National University College of  
25  
26  
27 9 Medicine, SMG-SNU Boramae Medical Center, Seoul, Republic of Korea

28  
29  
30 10 3 Department of Rehabilitation Medicine, Seoul National University College of  
31  
32  
33 11 Medicine, Seoul National University Bundang Hospital, Seongnam-si, Gyeonggi-do,  
34  
35 12 Republic of Korea

36  
37  
38 13 4 Department of Radiology, Seoul National University College of Medicine, SMG-  
39  
40  
41 14 SNU Boramae Medical Center, Seoul, Republic of Korea

42  
43  
44 15

45  
46 16 Address correspondence to Sang Yoon Lee, MD, PhD

47  
48  
49 17 Department of Rehabilitation Medicine, Seoul National University College of  
50  
51  
52 18 Medicine, SMG-SNU Boramae Medical Center, 20 Boramae-ro 5-gil, Dongjak-gu,  
53  
54 19 Seoul, 07061, Republic of Korea

55  
56  
57 20 Tel: +82 2 870 2673; Fax: +82 2 831 0714



1  
2  
3  
4  
5  
6  
7  
8  
9  
10  
11  
12  
13  
14  
15  
16  
17  
18  
19  
20  
21  
22  
23  
24  
25  
26  
27  
28  
29  
30  
31  
32  
33  
34  
35  
36  
37  
38  
39  
40  
41  
42  
43  
44  
45  
46  
47  
48  
49  
50  
51  
52  
53  
54  
55  
56  
57  
58  
59  
60

21 Email address: [rehabilee@gmail.com](mailto:rehabilee@gmail.com)

22 Word count: 3421

23

For peer review only

## 24 **ABSTRACT**

25 **Introduction:** Sarcopenia in the lumbar paraspinal muscles is receiving renewed  
26 attention as a cause of spinal degeneration. However, there are few studies on the  
27 precise concept and diagnostic criteria for spinal sarcopenia. Here, we develop the  
28 concept of spinal sarcopenia in community-dwelling older adults. In addition, we aim  
29 to observe the natural aging process of paraspinal and back muscle strength and  
30 investigate the association between conventional sarcopenic indices and spinal  
31 sarcopenia.

32 **Methods and analysis:** This is a prospective observational cohort study with 120  
33 healthy community-dwelling older adults over 4 years. All subjects will be recruited in  
34 no sarcopenia, possible sarcopenia, or sarcopenia groups. The primary outcomes of  
35 this study are isokinetic back muscle strength and lumbar paraspinal muscle quantity  
36 and quality evaluated using lumbar spine magnetic resonance imaging. Conventional  
37 sarcopenic indices and spine specific outcomes such as spinal sagittal balance, back  
38 performance scale, and Sorenson test will also be assessed.

39 **Ethics and dissemination:** Before screening, all participants will be provided with  
40 oral and written information. Ethical approval has already been obtained from all  
41 participating hospitals. The study results will be disseminated in peer-reviewed  
42 publications and conference presentations.

43 **Trial registration number:** NCT03962530

## 44 STRENGTHS AND LIMITATIONS OF THIS STUDY

- 45 ● This study is a prospective cohort study in healthy community-dwelling older  
46 adults, to develop the concept of spinal sarcopenia, by observing the natural  
47 aging process of paraspinal muscle and back muscle strength and  
48 investigating the association between conventional sarcopenic indices and  
49 spinal sarcopenia.
- 50 ● Standardised data evaluation for sarcopenia and the function of spinal  
51 extensor muscles will be used for the analysis with an application of relevant  
52 statistical methods.
- 53 ● Sample size was evaluated based on calculation of feasibility study due to  
54 the absence of previous literature concerning isokinetic back muscle strength  
55 or lumbar paraspinal muscle quantity.

## 57 INTRODUCTION

58

59 Sarcopenia is the age-related loss of skeletal muscle mass and function. It is a  
60 problem of not only muscle mass, but also muscle strength and performance.<sup>1,2</sup> It  
61 can also be defined as a syndrome characterized by progressive and generalized  
62 loss of skeletal muscle mass and strength with a risk of adverse outcomes such as  
63 physical disability, poor quality of life, and death.<sup>3</sup> The loss of muscle mass plays an  
64 important role in the frailty process of older adults, being a key player of its latent  
65 phase and explaining many aspects of the frailty status itself.<sup>4</sup>

66

67 Does Sarcopenia affect the spine? It is not difficult to answer the question if we think  
68 about the anatomy of the spine. While skeletal bone is the frame, and there are  
69 neural tissues inside the spinal canal, almost all surrounding tissues are skeletal  
70 muscles. There are huge extensor muscles at the posterior part of the spine and  
71 iliopsoas muscles also exist bilaterally around the spine. Thus, it is inevitable for  
72 sarcopenia to impact the spine. Receiving renewed attention is sarcopenia of the  
73 lumbar paraspinal muscles as a cause of spinal degeneration. Both the atrophy and  
74 fatty change of paraspinal muscles originating from sarcopenia are also known to be  
75 associated with functional disorders and chronic back pain.<sup>5</sup> We want to suggest  
76 classifying this phenomenon as “spinal sarcopenia”. However, there are few studies  
77 on the precise concept and diagnostic criteria for spinal sarcopenia and no clinical  
78 trials to determine whether it can be treated or prevented by strengthening exercise

1  
2  
3  
4 79 or nutritional support.  
5  
6  
7

8 80  
9

10 81 Classical sarcopenia indices proposed by several sarcopenia working groups<sup>6,7</sup> to  
11  
12 82 date cannot be used to diagnose spinal sarcopenia. While feasible, inexpensive, and  
13  
14 83 less radiation-exposed tools such as dual energy X-ray absorptiometry have been  
15  
16 84 used to measure appendicular skeletal muscle mass, paraspinal muscle assessment  
17  
18 85 still requires the use of spinal computed tomography (CT) or magnetic resonance  
19  
20 86 imaging (MRI). In addition, spinal extensor strength measurement is necessary to  
21  
22 87 confirm the function of the lumbar paraspinal muscle, but isokinetic strength  
23  
24 88 measuring equipment for accurate measurement is not as feasible as a hand-grip  
25  
26 89 strength dynamometer to evaluate sarcopenia. Furthermore, many older adults may  
27  
28 90 experience pain during the measurement of spinal extension strength.  
29  
30  
31  
32  
33

34 91  
35  
36

37 92 Therefore, it is necessary to develop a simple, accessible, and clinically meaningful  
38  
39 93 measurement index to confirm the function of spinal extensor muscles. In this  
40  
41 94 prospective cohort study, we will investigate the basic data of sarcopenia and  
42  
43 95 physical function as well as spine imaging (MRI and X-ray), back performance,  
44  
45 96 spinal sagittal balance, and back extensor strength in 120 healthy older adults.  
46  
47 97 Based on this, we will analyse the correlation between baseline sarcopenia, spinal  
48  
49 98 functional index, spinal sagittal balance index, and physical function. Furthermore,  
50  
51 99 we will observe the natural aging process of these indicators through long-term  
52  
53 100 follow-up over 4 years.  
54  
55  
56  
57  
58  
59  
60

1  
2  
3  
4 1015  
6  
7 102 **Objectives**8  
9  
10 103 1. To develop the concept of spinal sarcopenia in community-dwelling older  
11  
12 104 adults.13  
14  
15 105 2. In addition, we aim to observe the natural aging process of paraspinal muscle  
16  
17 106 and back extensor strength and investigate the association between  
18  
19 107 conventional sarcopenic indices and spinal sarcopenia.  
20  
21  
2223  
24 10825  
26  
27 10928  
29  
30 110 **METHOD AND ANALYSIS**31  
32  
33 11134  
35  
36 112 **Study design**37  
38  
39 113 This is a prospective observational cohort study with 120 healthy community-  
40  
41 114 dwelling older adults in a single center (SMG-SNU Boramae Medical Center).42  
43  
44 115 Individual follow-up will last 4 years.  
45  
4647  
48 11649  
50  
51 117 **Participants and eligibility criteria**52  
53  
54 118 Older adults ( $\geq 65$  years old) who are community-dwellers and able to walk with or  
55  
56 119 without assistive devices will be included. Participants who have experienced the  
57

1  
2  
3  
4 120 following will be excluded: 1) low back pain with moderate severity (numeric rating  
5  
6 121 scale<sup>8</sup> 5 and over); 2) history of any types of lumbar spine surgery; 3) history of hip  
7  
8 122 fracture surgery and arthroplasty of hip or knee; 4) contraindications for MRI (such  
9  
10 123 as cardiac pacemaker, implanted metallic objects, and claustrophobia); 5) disorders  
11  
12 124 in central nervous system (such as stroke, parkinsonism, spinal cord injury); 6)  
13  
14 125 cognitive dysfunction (Mini Mental State Examination score < 24); 7) communication  
15  
16 126 disorder (such as severe hearing loss); 8) musculoskeletal condition affecting  
17  
18 127 physical function (such as amputation of limb); 9) long-term use of corticosteroids  
19  
20 128 due to inflammatory disease; 10) malignancy requiring treatment within 5 years; and  
21  
22 129 11) other medical conditions which need active treatment; patients who refuse to  
23  
24 130 participate in a study will also be excluded.  
25  
26  
27  
28  
29

30 131 Sarcopenia can be divided by two stages: 1) possible sarcopenia (PS) defined by  
31  
32 132 low handgrip strength and/or low gait speed and 2) sarcopenia (SA) confirmed by  
33  
34 133 low handgrip strength and/or low gait speed and low muscle mass defined by the  
35  
36 134 consensus report of the Asian working group for sarcopenia.<sup>6</sup> A no sarcopenia (NS)  
37  
38 135 group is added to this classification, and the study participants are classified into  
39  
40 136 three groups (NS, PS, and SA) after the screening tests (Figure 1).  
41  
42  
43  
44  
45  
46  
47

## 48 138 **Outcomes measures**

### 49 50 51 139 Primary outcome measures

#### 52 53 140 *1. Isokinetic back muscle strength*

54  
55  
56 141 The investigators will use the isokinetic dynamometer (Biodex multi-joint  
57  
58  
59  
60

1  
2  
3  
4 142 system, Biodex Corporation, Shirley, NY, USA) to measure the torque of the  
5  
6 143 back extensors. Briefly, the examination will be performed by seating the  
7  
8  
9 144 patient comfortably in the device, fixing both the thighs and the back to the  
10  
11 145 chair using a strap, and asking the patient to hold the handle placed near the  
12  
13 146 front, at the chest, to measure upper limb and hip joint motions. The  
14  
15  
16 147 dynamometer axis will be located on the anterior superior iliac spine of the  
17  
18 148 patient's pelvis. All patients will be instructed to flex and extend the back five  
19  
20 149 times at an angular velocity of 60°/sec as a warm-up before the examination.  
21  
22  
23 150 During the examination, patients will be instructed to execute flexion and  
24  
25 151 extension of the back, with a maximum effort, 10 times at an angular velocity  
26  
27 152 of 60°/sec. The back range of movement was 22 limited at 50°, with 30°  
28  
29 153 (-30°) of trunk flexion and 20° (+20°) of trunk extension, relative to the  
30  
31  
32 154 anatomical reference position (0°).<sup>9</sup> The device will measure the peak torque  
33  
34 155 (PT) (Nm) and the peak torque per body weight (PT/Bwt) (Nm/kg).<sup>10</sup>  
35

## 36 156 2. *Lumbar paraspinal muscle quantity and quality*

37  
38  
39 157 Lumbar spine MRI will be performed using a 1.5-T scanner (Achieva 1.5 T;  
40  
41 158 Philips Healthcare, Netherlands). Subjects will be placed in the supine  
42  
43 159 position with the lumbar spine in a neutral position and a pillow under their  
44  
45  
46 160 head and knees. The imaging protocol will include sagittal T2-weighted fast  
47  
48 161 spin echo imaging (repetition time, 3,200 ms/echo; echo time, 100 ms; echo-  
49  
50 162 train length, 20; section thickness, 4 mm; and field of view, 300 × 300 mm)  
51  
52  
53 163 and axial T2-weighted fast spin echo imaging (repetition time, 3,500 ms/echo;  
54  
55 164 echo time, 100 ms; echo-train length, 20; section thickness, 4 mm; and field  
56  
57  
58  
59  
60



1  
2  
3  
4 165 of view, 200 × 200 mm). Axial images will be obtained for each lumbar  
5  
6 166 intervertebral level (T12/L1-L5/S1) parallel to the vertebral endplates with five  
7  
8  
9 167 slices at each intervertebral level.

10  
11 168 The measurement of the cross sectional area (CSA) and fatty infiltration ratio  
12  
13 169 (FI %) of the paraspinal muscles (erector spinae [ES], multifidus [MF], and  
14  
15 170 psoas major [PM]) will be performed with axial T2-weighted images using a  
16  
17 171 radiological workstation (MEDIP; Medical IP, Seoul, South Korea) specially  
18  
19  
20 172 designed for such purposes. The measurement of ES and MF will be  
21  
22 173 performed from the level of L1/L2 to L5/S1 and that of PM will be performed  
23  
24 174 at the level of L4/5. The CSA will be measured by manually constructing free-  
25  
26 175 draw points around the outer margins of the individual muscles using touch  
27  
28 176 screen LCD monitor (XPS 15 9570, Dell, Round Rock, TX, USA) and digital  
29  
30 177 touch screen pen (PN556W Dell Active Pen, Dell, Round Rock, TX, USA).  
31  
32 178 The FI % is defined as the percentage of fatty infiltration area, which is  
33  
34 179 obtained by dividing the fatty infiltration area by the total area. The CSA and  
35  
36 180 FI % of paraspinal muscles will be separately measured on the bilateral sides,  
37  
38 181 and mean values will be calculated.<sup>11</sup>  
39  
40  
41  
42  
43  
44  
45  
46  
47

## 183 Secondary outcome measures

### 184 1. *Conventional sarcopenic indices*

- 48  
49  
50 185 A. Appendicular skeletal muscle mass (ASM): Both dual-energy X-ray  
51  
52 186 absorptiometry (Lunar iDXA for Bone Health; GE Healthcare,  
53  
54 187 Schenectady, NY, USA) and bio-impedance analysis (InBody 720;  
55  
56  
57  
58  
59  
60

1  
2  
3  
4 188 Biospace, Seoul, South Korea) will be used to analyse body composition  
5  
6 189 including lean body and fat masses. ASM will be calculated by obtaining  
7  
8  
9 190 the sum of the lean mass in bilateral upper and lower extremities<sup>12</sup> and  
10  
11 191 standardized by being divided by the squared height value (ASM/Ht<sup>2</sup>,  
12  
13 192 kg/m<sup>2</sup>).

15  
16 193 B. Handgrip strength: It will be measured using a hand-grip dynamometer  
17  
18 194 (T.K.K.5401; Takei Scientific Instruments, Tokyo, Japan)<sup>13</sup>, as described  
19  
20 195 previously<sup>14</sup>. Briefly, while sitting in a straight-backed chair with their feet  
21  
22 196 flat on the floor, patients will be asked to adduct and neutrally rotate the  
23  
24  
25 197 shoulder, flex the elbow to 90°, and place the forearm in a neutral  
26  
27 198 position, with the wrist between 0° and 30° extension and between 0° and  
28  
29 199 15° ulnar deviation. Subjects will be instructed to squeeze the handle as  
30  
31  
32 200 hard as possible for 3 seconds, and the maximum contraction force (Kg)  
33  
34 201 will be recorded.

36 202 C. Short physical performance battery (SPPB): Functional examination  
37  
38 203 using SPPB derived from three objective physical function tests (i.e., the  
39  
40 204 time taken to cover 4 m at a comfortable walking speed, time taken to  
41  
42 205 stand from sitting in a chair 5 times without stopping, and ability to  
43  
44  
45 206 maintain balance for 10 s in three different foot positions at progressively  
46  
47  
48 207 more challenging levels).<sup>15</sup> A score from 0 to 4 will be assigned to  
49  
50 208 performance on each task, with higher scores indicating better lower  
51  
52 209 body function.

## 55 210 2. *Spine specific outcomes*

- 1  
2  
3  
4 211 A. Isometric back muscle strength: In addition to the isokinetic back muscle  
5  
6 212 strength test, we will perform the isometric back muscle strength test  
7  
8  
9 213 using a handheld dynamometer (PowerTrack II; JTECH Medical, Salt  
10  
11 214 Lake City, UT, USA). This will involve the participant standing in full  
12  
13 215 extension with their back to a wall, midway between two vertically  
14  
15  
16 216 oriented anchor rails, and feet flat on the floor with heels touching the  
17  
18 217 wall. An inelastic belt will be looped through the anchor rails, and secured  
19  
20 218 firmly around the participant, 1 cm below the anterior superior iliac  
21  
22  
23 219 spines, in order to restrain movement and maintain participant contact  
24  
25 220 with the wall during the test. To standardise posture, arms will be crossed  
26  
27 221 over the chest, with fingertips level with the contralateral shoulders. The  
28  
29  
30 222 participant will be instructed to flex forward approximately 15° at the hips  
31  
32 223 so the handheld dynamometer can be positioned posterior to the spinous  
33  
34 224 process of the seventh thoracic vertebrae. In this way, counter pressure  
35  
36 225 will be provided by the fixed wall behind the participants' back so that  
37  
38 226 variations in resistance by an examiner will be avoided.<sup>16</sup>
- 41 227 B. Spinal sagittal balance (SSB): For each participant, one lateral  
42  
43 228 radiograph of the whole spine will be made and digitized. All  
44  
45  
46 229 measurements will be performed by means of imaging software  
47  
48 230 (INFINITT PACS M6; INFINITT Healthcare, Seoul, South Korea), as  
49  
50 231 previously described.<sup>17,18</sup> Briefly, the following spinopelvic radiographic  
51  
52 232 parameters will be analysed: sacral slope (SS), pelvic incidence (PI),  
53  
54  
55 233 pelvic tilt (PT), lumbar lordosis (LL), thoracic kyphosis (TK), the ratio of LL

1  
2  
3  
4 234 to PI (LL/PI), PI-LL mismatch (PI-LL; the difference between the pelvic  
5  
6 235 incidence and lumbar lordosis), and sagittal vertical axis (SVA). PI-LL will  
7  
8  
9 236 be used as the primary outcomes of SSB.<sup>19</sup>

10  
11 237 C. Back performance scale (BPS): BPS consists of five tests: Sock Test, the  
12  
13 238 Pick-up Test, the Roll-up Test, the Fingertip-to-Floor Test, and the Lift  
14  
15 239 Test. The 5 tests comprising the BPS demonstrate associations with  
16  
17 240 each other, and each test contributes to high internal consistency,  
18  
19 241 implying that the tests share a common characteristic in measuring  
20  
21 242 physical performance.<sup>20</sup> The BPS sum score (0-15) is calculated by  
22  
23 243 adding the individual scores of the 5 tests.

24  
25  
26  
27 244 D. Sorensen test: It is the most widely used test in published studies  
28  
29 245 evaluating the isometric endurance of the trunk extensor muscles. The  
30  
31 246 test consists of measuring the amount of time a person can hold the  
32  
33 247 unsupported upper body in a horizontal prone position with the lower  
34  
35 248 body fixed to the examining table.<sup>21</sup>

### 39 249 3. *Other functional outcomes*

40  
41 250 A. Berg balance scale (BBS): Balance and fall risk will be assessed using  
42  
43 251 BBS (range: 0–56; a lower score indicates a worse outcome).<sup>22</sup>

44  
45 252 B. Quality of life (QOL): It will be evaluated using the Euro Quality of Life  
46  
47 253 Questionnaire five-dimensional classification (EQ-5D; range: 0–1; a lower  
48  
49 254 score indicates a worse outcome).<sup>23</sup>

50  
51 255 C. Activities of daily living (ADLs): ADLs will be determined using the Korean  
52  
53 256 version of the modified Barthel index<sup>24</sup> (K-MBI; range: 0–100; a lower

1  
2  
3  
4 257 score indicates a worse outcome) and the Korean version of the  
5  
6 258 Instrumental ADL (K-IADL; range: 0–3; a higher score indicates a worse  
7  
8  
9 259 outcome).<sup>25</sup>

10  
11 260 D. Frailty: It will be assessed based on fatigue, resistance, ambulation,  
12  
13 261 illnesses, and loss of weight (FRAIL) using the Korean version of the  
14  
15 262 FRAIL scale (K-FRAIL; range: 0–5; a lower score indicates a worse  
16  
17 263 outcome).<sup>26</sup>

18  
19  
20 264 4. *Serum examination*

21  
22  
23 265 A. Serum chemistry, complete blood counts (CBC), blood urea nitrogen and  
24  
25 266 creatinine will be obtained.

26  
27 267 B. Interleukin-6 (IL-6) level will be quantified by Green-Cross laboratory (GC  
28  
29 268 lab, Seoul, Korea) using standard procedures.

30  
31  
32 269  
33  
34 270 All outcome variables will be collected at baseline, 2 and 4 years. However, L-S  
35  
36 271 spine MRI for lumbar paraspinal muscle quantity and quality will be performed only  
37  
38 272 at baseline (Table 1).

39  
40  
41 273  
42  
43  
44  
45  
46  
47  
48  
49  
50  
51  
52  
53  
54  
55  
56  
57  
58  
59  
60

274 Table 1. Overview of the outcome measures and time points of assessment

|                                       | Screening | Baseline | 2 years | 4 years |
|---------------------------------------|-----------|----------|---------|---------|
| <b>Eligibility</b>                    | X         |          |         |         |
| <b>Eligibility confirmation</b>       |           | X        |         |         |
| <b>Informed consent</b>               |           | X        |         |         |
| <b>Demographic information</b>        |           | X        |         |         |
| <b>Medical History</b>                |           | X        | X       | X       |
| <b>Body composition (image study)</b> |           |          |         |         |
| Wholebody DEXA and BIA                | BIA       | DEXA     | X       | X       |
| Whole spine X-ray (lateral)           |           | X        | X       | X       |
| L-S spine MRI                         |           | X        |         |         |
| <b>Function and performance</b>       |           |          |         |         |
| Handgrip strength                     | X         | X        | X       | X       |
| Gait function                         | X         | X        | X       | X       |
| SPPB                                  |           | X        | X       | X       |
| Physical activity                     |           | X        | X       | X       |
| Balance function                      |           | X        | X       | X       |
| <b>Spine performance</b>              |           |          |         |         |
| Isokinetic back muscle strength       |           | X        | X       | X       |
| Isometric back muscle strength        |           | X        | X       | X       |
| Sorenson test                         |           | X        | X       | X       |
| Back performance scale                |           | X        | X       | X       |
| <b>Others</b>                         |           |          |         |         |
| Frailty                               |           | X        | X       | X       |
| QoL questionnaire                     |           | X        | X       | X       |
| Activity daily living                 |           | X        | X       | X       |
| Laboratory test with biomarker        |           | X        | X       | X       |

275 DEXA, Dual-energy X-ray absorptiometry; BIA, Bio-impedance analysis; MRI,

276 Magnetic resonance imaging; SPPB, Short Physical Performance Battery, QoL,

1  
2  
3  
4  
5  
6  
7  
8  
9  
10  
11  
12  
13  
14  
15  
16  
17  
18  
19  
20  
21  
22  
23  
24  
25  
26  
27  
28  
29  
30  
31  
32  
33  
34  
35  
36  
37  
38  
39  
40  
41  
42  
43  
44  
45  
46  
47  
48  
49  
50  
51  
52  
53  
54  
55  
56  
57  
58  
59  
60

277 Quality of life.

For peer review only

## 279 **Data analysis**

280 Data will be collected using a standardised data entry form and entered into the data  
281 management system. Participant characteristics will be described using means and  
282 standard deviations for continuous data and frequencies and percentages for  
283 categorical data. The three groups will be compared using an analysis of variance  
284 (ANOVA) or the non-parametric equivalence, a Kruskal–Wallis test, if required. To  
285 compare paired data (intra-group) between two different points, we will use  
286 repeated-measures ANOVA and Friedman tests for continuous and non-parametric  
287 data, respectively. Statistical significance will be defined as a P value < 0.05. All  
288 statistical analyses will be performed using SPSS version 19.0 for Windows (IBM  
289 Corp., Chicago, IL, USA).

## 291 **Sample size**

292 We intended to perform the sample size calculation based on the difference in mean  
293 of isokinetic back muscle strength or lumbar paraspinal muscle quantity among  
294 groups. However, there was no literature available concerning isokinetic back  
295 muscle strength or lumbar paraspinal muscle quantity in general practices or  
296 hospitals, let alone effect sizes. Therefore, we based our sample size calculation on  
297 feasibility. A total of 120 subjects will be recruited in order to ensure 20 male and 20  
298 female participants per group, in three groups (NS, PS, and SA groups) based on  
299 sarcopenia.

300



## 301 **Patient and public involvement**

302 While participants were not involved in the development of the research question  
303 and the selection of outcome measures, their needs and preferences were  
304 considered throughout the process. Feedback to the participants regarding scientific  
305 results, will be organised on each study site.

306

## 307 **ETHICS AND DISSEMINATION**

308 This protocol is approved by the institutional review board of Seoul Metropolitan  
309 Government Seoul National University (SMG-SNU) Boramae Medical Center (IRB  
310 No. 20-2019-19). The study will be performed in accordance with the relevant  
311 guidelines of the Declaration of Helsinki, 1964, as amended in Tokyo, 1975; Venice,  
312 1983; Hong Kong, 1989; and Somerset West, 1996.<sup>27</sup> Written informed consent for  
313 all interventions and examinations will be obtained at patient admission. The Ethics  
314 Board will be informed of all serious adverse events and any unanticipated adverse  
315 effects that occur during the study. The study protocol has been registered at  
316 Clinicaltrials.gov and will be updated. Direct access to the source data will be  
317 provided for monitoring, audits, Research Ethics Committee (REC)/Institutional  
318 Review Board (IRB) review, and regulatory authority inspections during and after the  
319 study. All patient information will be coded anonymously, with only the study team  
320 having access to the original data. The study results will be disseminated in peer-  
321 reviewed publications and conference presentations.

322

1  
2  
3  
4 3235  
6  
7 324 **DISCUSSION**8  
9  
10 325

11  
12  
13  
14 326 Skeletal muscle mass measurement to define sarcopenia has mainly been based on  
15  
16 327 the sum of muscle mass in the limbs (appendicular limb muscle mass). However the  
17  
18 328 question remains whether this sum of limb muscle mass is associated with muscle  
19  
20 329 function throughout the whole body. Lee et al. reported that degenerative arthritis of  
21  
22 330 the knee joint was associated with only lower limb muscle mass, but not with upper  
23  
24 331 limb muscle mass.<sup>28</sup> Recently, Jeon et al. also suggested that the sum of limb  
25  
26 332 muscle mass was not correlated with the radiological degenerative changes of the  
27  
28 333 lumbar spine and hip joint.<sup>29</sup> Therefore, site-specific muscle mass investigation is  
29  
30 334 necessary to evaluate the effect of skeletal muscle on specific regions.

31  
32  
33  
34  
35 335 Currently, SSB is an important indicator of outcomes of lumbar spine surgery,<sup>30</sup> and  
36  
37 336 even non-operative treatment of spinal stenosis.<sup>31</sup> While SSB can be affected by  
38  
39 337 sex<sup>32</sup> and ethnicity,<sup>33</sup> aging is the most important cause of spinal sagittal  
40  
41 338 imbalance.<sup>34</sup> Decreased lumbar lordosis is an important cause of spinal sagittal  
42  
43 339 imbalance, and it is known to originate from the wedging or decreased height of the  
44  
45 340 intervertebral discs in the absence of vertebral compression fractures.<sup>35,36</sup> However,  
46  
47 341 spinal sagittal imbalance is difficult to explain only by the height of the intervertebral  
48  
49 342 discs or vertebral bodies. Therefore, we can hypothesize that spinal sarcopenia is  
50  
51 343 one of the causes of spinal sagittal imbalance which the current cohort study will  
52  
53 344 prove.

1  
2  
3  
4 345 Several specific assessments such as cross-sectional area of paraspinal muscles,  
5  
6 346 back muscle strength, and back performance test are required to evaluate spinal  
7  
8 347 sarcopenia. However, unlike limb skeletal muscles, the functional evaluation of the  
9  
10 348 spine corresponding to the center of the body is not practical. Thus, this cohort study  
11  
12 349 will investigate the value of SSB as a substitute for back muscle strength and  
13  
14 350 performance measurement. In other words, if back muscle strength and functional  
15  
16 351 impairment are directly related to the spinal sagittal imbalance, a simple measurable  
17  
18 352 SSB may be a useful index to represent spinal muscle function.  
19  
20  
21  
22  
23  
24  
25  
26

### 27 354 **Authors' contributions**

28  
29  
30 355 SYL conceived the study and is the principal investigator. JCK, SUL, SHJ, JYL, and  
31  
32 356 DHK contributed to the development of the study. All authors approved the version to  
33  
34 357 be published and are responsible for its accuracy.  
35  
36  
37  
38  
39  
40  
41  
42

### 43 359 **Funding**

44  
45 360 This work was supported by the National Research Foundation of Korea (NRF) grant  
46  
47 361 funded by the Korea government (MSIT) (No. 2019R1C1C100632).  
48  
49  
50  
51  
52

### 53 363 **Competing interests**

54  
55  
56  
57 364 None declared  
58  
59  
60

**REFERENCES**

1. Doherty TJ. Invited review: Aging and sarcopenia. *J Appl Physiol* (1985) 2003;95:1717-27.
2. Morley JE. Sarcopenia: diagnosis and treatment. *J Nutr Health Aging* 2008;12:452-6.
3. Delmonico MJ, Harris TB, Lee JS, et al. Alternative definitions of sarcopenia, lower extremity performance, and functional impairment with aging in older men and women. *J Am Geriatr Soc* 2007;55:769-74.
4. Pedone C, Costanzo L, Cesari M, Bandinelli S, Ferrucci L, Antonelli Incalzi R. Are Performance Measures Necessary to Predict Loss of Independence in Elderly People? *J Gerontol A Biol Sci Med Sci* 2016;71:84-9.
5. Masaki M, Ikezoe T, Fukumoto Y, et al. Association of sagittal spinal alignment with thickness and echo intensity of lumbar back muscles in middle-aged and elderly women. *Archives of gerontology and geriatrics* 2015;61:197-201.
6. Chen LK, Liu LK, Woo J, et al. Sarcopenia in Asia: consensus report of the Asian Working Group for Sarcopenia. *J Am Med Dir Assoc* 2014;15:95-101.
7. Cruz-Jentoft AJ, Baeyens JP, Bauer JM, et al. Sarcopenia: European consensus on definition and diagnosis: Report of the European Working Group on Sarcopenia in Older People. *Age Ageing* 2010;39:412-23.
8. Childs JD, Piva SR, Fritz JM. Responsiveness of the numeric pain rating scale in patients with low back pain. *Spine* 2005;30:1331-4.
9. Juan-Recio C, Lopez-Plaza D, Barbado Murillo D, Garcia-Vaquero MP, Vera-Garcia FJ. Reliability assessment and correlation analysis of 3 protocols to measure

- 1  
2  
3  
4 389 trunk muscle strength and endurance. *J Sports Sci* 2018;36:357-64.  
5  
6 390 10. Lee HJ, Lim WH, Park JW, et al. The Relationship between Cross Sectional  
7  
8 391 Area and Strength of Back Muscles in Patients with Chronic Low Back Pain. *Annals*  
9  
10 392 of rehabilitation medicine 2012;36:173-81.  
11  
12  
13 393 11. Sasaki T, Yoshimura N, Hashizume H, et al. MRI-defined paraspinal muscle  
14  
15 394 morphology in Japanese population: The Wakayama Spine Study. *PLoS One*  
16  
17 395 2017;12:e0187765.  
18  
19  
20 396 12. Baumgartner RN, Koehler KM, Gallagher D, et al. Epidemiology of  
21  
22 397 sarcopenia among the elderly in New Mexico. *American journal of epidemiology*  
23  
24 398 1998;147:755-63.  
25  
26  
27 399 13. Pedrero-Chamizo R, Albers U, Tobaruela JL, Melendez A, Castillo MJ,  
28  
29 400 Gonzalez-Gross M. Physical strength is associated with Mini-Mental State  
30  
31 401 Examination scores in Spanish institutionalized elderly. *Geriatrics & gerontology*  
32  
33 402 international 2013;13:1026-34.  
34  
35  
36 403 14. Ro HJ, Kim DK, Lee SY, Seo KM, Kang SH, Suh HC. Relationship Between  
37  
38 404 Respiratory Muscle Strength and Conventional Sarcopenic Indices in Young Adults:  
39  
40 405 A Preliminary Study. *Annals of rehabilitation medicine* 2015;39:880-7.  
41  
42  
43 406 15. Guralnik JM, Ferrucci L, Simonsick EM, Salive ME, Wallace RB. Lower-  
44  
45 407 extremity function in persons over the age of 70 years as a predictor of subsequent  
46  
47 408 disability. *N Engl J Med* 1995;332:556-61.  
48  
49  
50 409 16. Harding AT, Weeks BK, Horan SA, Little A, Watson SL, Beck BR. Validity  
51  
52 410 and test-retest reliability of a novel simple back extensor muscle strength test. *SAGE*  
53  
54 411 *Open Med* 2017;5:2050312116688842.  
55  
56  
57  
58  
59  
60

- 1  
2  
3  
4 412 17. Vialle R, Levassor N, Rillardon L, Templier A, Skalli W, Guigui P.  
5  
6 413 Radiographic analysis of the sagittal alignment and balance of the spine in  
7  
8 414 asymptomatic subjects. The Journal of bone and joint surgery American volume  
9  
10 415 2005;87:260-7.  
11  
12  
13 416 18. Buckland AJ, Ramchandran S, Day L, et al. Radiological lumbar stenosis  
14  
15 417 severity predicts worsening sagittal malalignment on full-body standing  
16  
17 418 stereoradiographs. The spine journal : official journal of the North American Spine  
18  
19 419 Society 2017.  
20  
21  
22 420 19. Koller H, Pfanz C, Meier O, et al. Factors influencing radiographic and clinical  
23  
24 421 outcomes in adult scoliosis surgery: a study of 448 European patients. European  
25  
26 422 spine journal : official publication of the European Spine Society, the European  
27  
28 423 Spinal Deformity Society, and the European Section of the Cervical Spine Research  
29  
30 424 Society 2016;25:532-48.  
31  
32  
33 425 20. Strand LI, Moe-Nilssen R, Ljunggren AE. Back Performance Scale for the  
34  
35 426 assessment of mobility-related activities in people with back pain. Phys Ther  
36  
37 427 2002;82:1213-23.  
38  
39  
40 428 21. Demoulin C, Vanderthommen M, Duysens C, Crielaard JM. Spinal muscle  
41  
42 429 evaluation using the Sorensen test: a critical appraisal of the literature. Joint Bone  
43  
44 430 Spine 2006;73:43-50.  
45  
46  
47 431 22. Berg K, Wood-Dauphinee S, Williams JI. The Balance Scale: reliability  
48  
49 432 assessment with elderly residents and patients with an acute stroke. Scand J  
50  
51 433 Rehabil Med 1995;27:27-36.  
52  
53  
54 434 23. Group TE. EuroQol-a new facility for the measurement of health-related  
55  
56  
57  
58  
59  
60

- 1  
2  
3  
4 435 quality of life. *Health policy* 1990;16:199-208.
- 5  
6 436 24. Jung HY, Park BK, Shin HS, et al. Development of the Korean version of  
7  
8 437 Modified Barthel Index (K-MBI): multi-center study for subjects with stroke. *Journal of*  
9  
10 438 *Korean Academy of Rehabilitation Medicine* 2007;31:283-97.
- 11  
12  
13 439 25. Won CW, Yang KY, Rho YG, et al. The development of Korean activities of  
14  
15 440 daily living (K-ADL) and Korean instrumental activities of daily living (K-IADL) scale.  
16  
17 441 *Journal of the Korean Geriatrics Society* 2002;6:107-20.
- 18  
19  
20 442 26. Jung HW, Yoo HJ, Park SY, et al. The Korean version of the FRAIL scale:  
21  
22 443 clinical feasibility and validity of assessing the frailty status of Korean elderly. *Korean*  
23  
24 444 *J Intern Med* 2016;31:594-600.
- 25  
26  
27 445 27. Dale O, Salo M. The Helsinki Declaration, research guidelines and  
28  
29 446 regulations: present and future editorial aspects. *Acta anaesthesiologica*  
30  
31 447 *Scandinavica* 1996;40:771-2.
- 32  
33  
34 448 28. Lee SY, Ro HJ, Chung SG, Kang SH, Seo KM, Kim DK. Low Skeletal Muscle  
35  
36 449 Mass in the Lower Limbs Is Independently Associated to Knee Osteoarthritis. *PLoS*  
37  
38 450 *One* 2016;11:e0166385.
- 39  
40  
41 451 29. Jeon H, Lee SU, Lim JY, Chung SG, Lee SJ, Lee SY. Low skeletal muscle  
42  
43 452 mass and radiographic osteoarthritis in knee, hip, and lumbar spine: a cross-  
44  
45 453 sectional study. *Aging Clin Exp Res* 2019.
- 46  
47  
48 454 30. Hikata T, Watanabe K, Fujita N, et al. Impact of sagittal spinopelvic alignment  
49  
50 455 on clinical outcomes after decompression surgery for lumbar spinal canal stenosis  
51  
52 456 without coronal imbalance. *Journal of neurosurgery Spine* 2015;23:451-8.
- 53  
54  
55 457 31. Beyer F, Geier F, Bredow J, Oppermann J, Eysel P, Sobottke R. Influence of  
56  
57  
58  
59  
60

- 1  
2  
3  
4 458 spinopelvic parameters on non-operative treatment of lumbar spinal stenosis.  
5  
6  
7 459 Technology and health care : official journal of the European Society for Engineering  
8  
9 460 and Medicine 2015;23:871-9.  
10  
11 461 32. Sinaki M, Itoi E, Rogers JW, Bergstralh EJ, Wahner HW. Correlation of back  
12  
13 462 extensor strength with thoracic kyphosis and lumbar lordosis in estrogen-deficient  
14  
15 463 women. American journal of physical medicine & rehabilitation 1996;75:370-4.  
16  
17  
18 464 33. Zhu Z, Xu L, Zhu F, et al. Sagittal alignment of spine and pelvis in  
19  
20 465 asymptomatic adults: norms in Chinese populations. Spine 2014;39:E1-6.  
21  
22  
23 466 34. Gelb DE, Lenke LG, Bridwell KH, Blanke K, McEneaney KW. An analysis of  
24  
25 467 sagittal spinal alignment in 100 asymptomatic middle and older aged volunteers.  
26  
27 468 Spine 1995;20:1351-8.  
28  
29  
30 469 35. Takeda N, Kobayashi T, Atsuta Y, Matsuno T, Shirado O, Minami A.  
31  
32 470 Changes in the sagittal spinal alignment of the elderly without vertebral fractures: a  
33  
34 471 minimum 10-year longitudinal study. Journal of orthopaedic science : official journal  
35  
36 472 of the Japanese Orthopaedic Association 2009;14:748-53.  
37  
38  
39 473 36. Frobin W, Brinckmann P, Kramer M, Hartwig E. Height of lumbar discs  
40  
41 474 measured from radiographs compared with degeneration and height classified from  
42  
43 475 MR images. European radiology 2001;11:263-9.  
44  
45  
46  
47 476  
48  
49  
50  
51  
52  
53  
54  
55  
56  
57  
58  
59  
60



1  
2  
3  
4 477 **FIGURE LEGEND**

5  
6 478 **Figure 1.** Flow diagram of the cohort study  
7  
8  
9  
10  
11  
12  
13  
14  
15  
16  
17  
18  
19  
20  
21  
22  
23  
24  
25  
26  
27  
28  
29  
30  
31  
32  
33  
34  
35  
36  
37  
38  
39  
40  
41  
42  
43  
44  
45  
46  
47  
48  
49  
50  
51  
52  
53  
54  
55  
56  
57  
58  
59  
60

For peer review only

1  
2  
3  
4  
5  
6  
7  
8  
9  
10  
11  
12  
13  
14  
15  
16  
17  
18  
19  
20  
21  
22  
23  
24  
25  
26  
27  
28  
29  
30  
31  
32  
33  
34  
35  
36  
37  
38  
39  
40  
41  
42  
43  
44  
45  
46  
47  
48  
49  
50  
51  
52  
53  
54  
55  
56  
57  
58  
59  
60

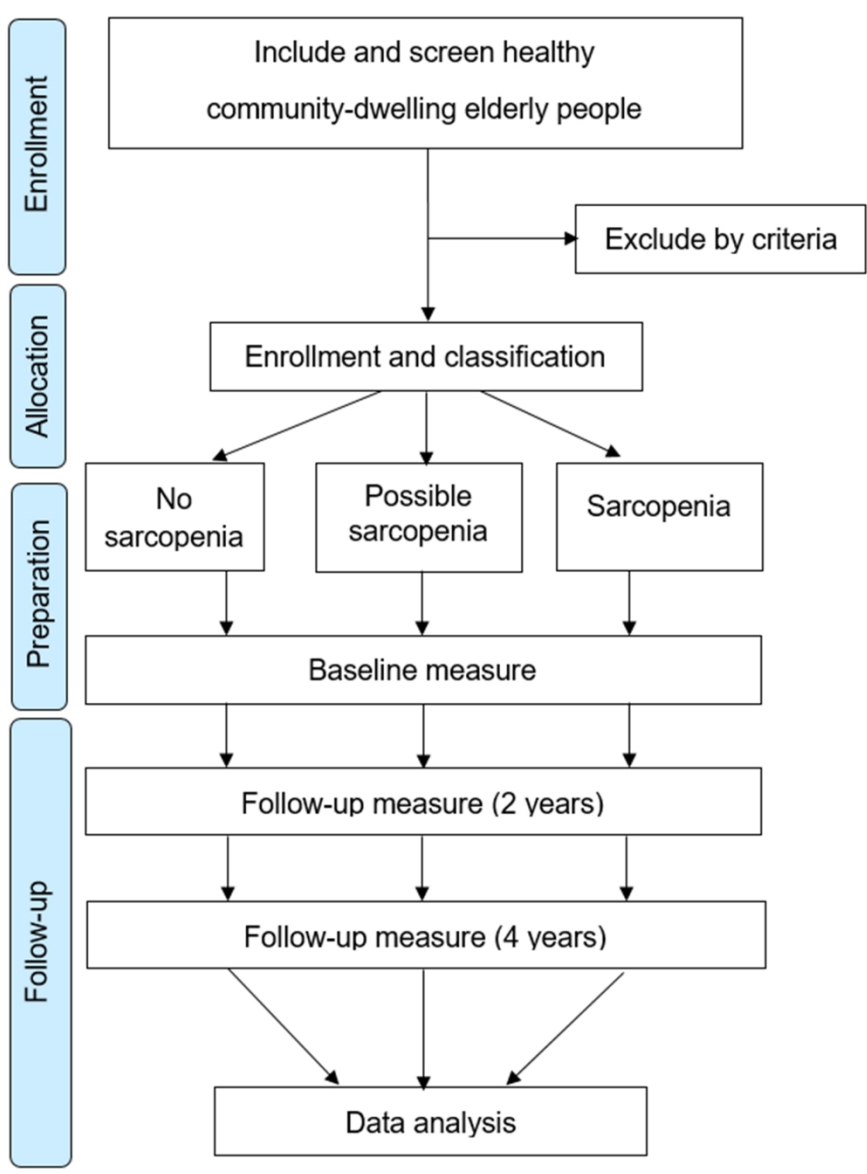

Figure 1. Flow diagram of the cohort study

190x254mm (300 x 300 DPI)
